# Supplementary material
Source: PubMed Central journal article supplement (PMC5838943)

## Supplementary Online Content

Lou L, Ye X, Xu P, et al. Association of sex with the global burden of cataract. *JAMA Ophthalmol*. Published online December 14, 2017.  
doi:10.1001/jamaophthalmol.2017.5668

**eFigure.** Trends in World Health Organization Regional Sex-Specific Age-Standardized DALY Rates Caused by Cataract From 1990 to 2015

This supplementary material has been provided by the authors to give readers additional information about their work.

eFigure. Trends in World Health Organization Regional Sex-Specific Age-Standardized DALY Rates Caused by Cataract From 1990 to 2015

(A) African region, (B) Eastern Mediterranean region, (C) European region, (D) region of the Americas, (E) South-East Asia region, and (F) Western Pacific region. DALYs, disability-adjusted life years.

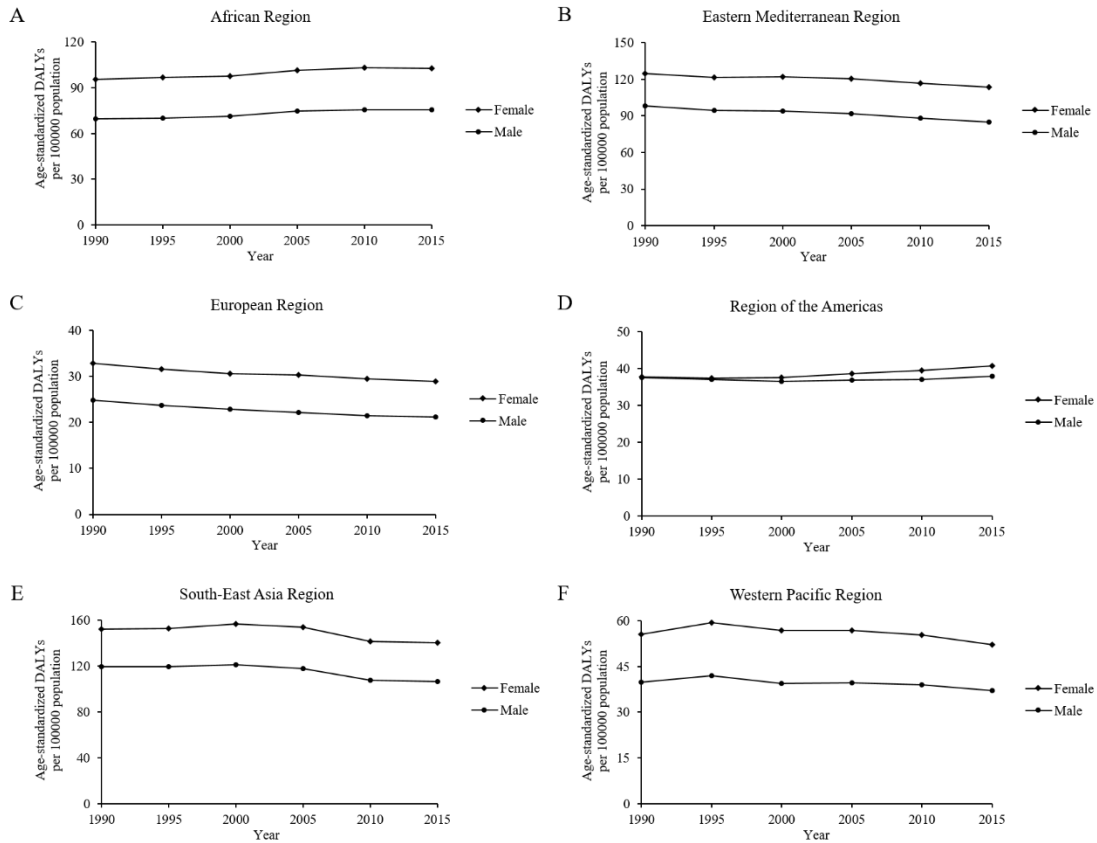

Supplement: jamaophthalmol-136-116-s001.pdf [file jamaophthalmol-136-116-s001.pdf]
